# Supplementary material
Source: Springer Nature journal article supplement (https://www.springermedizin.de/resource/supplementary/12943_2010_793_MOESM3_ESM.pdf/9554850)

**A**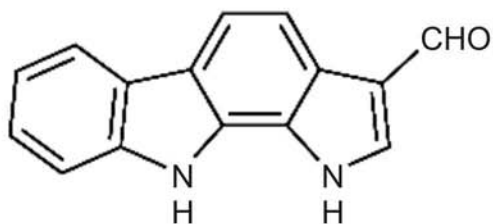**B**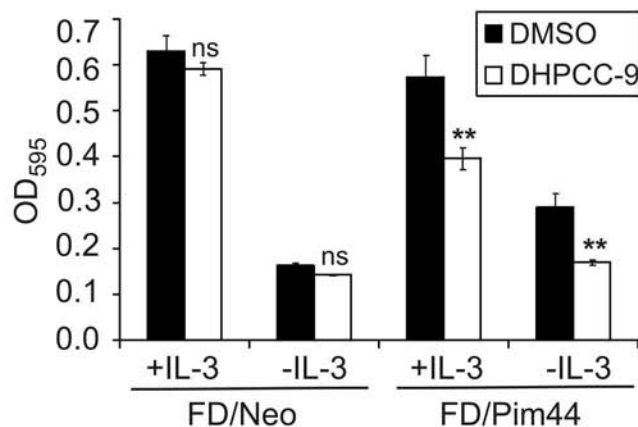**C**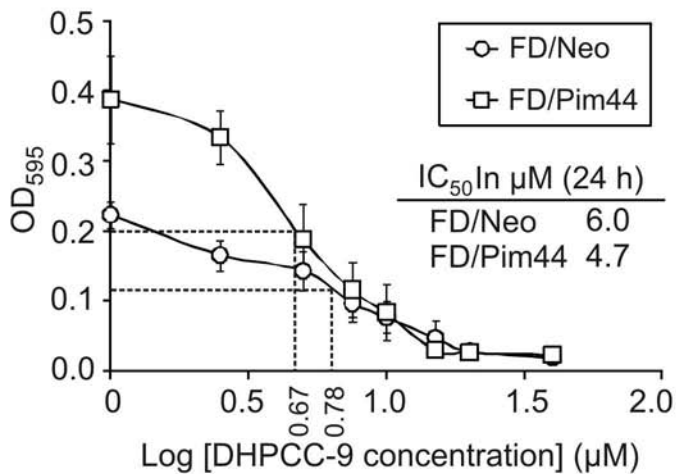**D**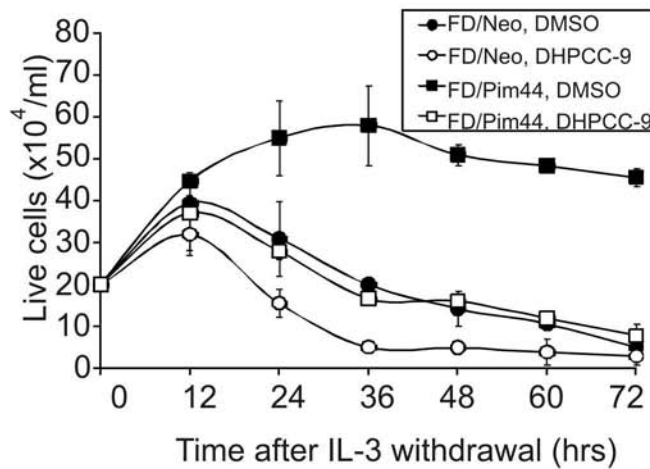

Supplement: MOESM3 [file 9554850]
